# Supplementary material
Source: publisher figshare collection journal article supplement (https://sage.figshare.com/ndownloader/files/21001590)
Supplement: Supplementary file 1 [file 21001590]

## PATIENT INTERVIEW

Indicate the term that best describes the quality of your facial pain:

- ☐ Electric shock-like sensation
- ☐ Stabbing
- ☐ Burning
- ☐ Throbbing
- ☐ Pressing

Indicate the site and the side of facial pain.....

How long does the attack last (in case of electric shock-like sensation how long does one paroxysm of pain last)

- ☐ Seconds, fractions of a second                      Number.....
- ☐ Minutes                                                              Number.....
- ☐ Hours

Indicate the mean number of pain attacks in a day .....

Mark the number better describing the mean intensity of pain

No pain    0    1    2    3    4    5    6    7    8    9    10    Worst possible pain

Age at onset .....

SECTION TO BE COMPLETED IN CASE OF PAROXISMAL PAIN:

Can pain arise spontaneously?        YES        NO

Is pain triggered by movements or by the light touch of face and oral mucosa?    YES        NO

If yes, please indicate the manoeuvres able to trigger pain:

- ☐ Gently touching the face

- ☐ Talking
- ☐ Chewing
- ☐ Swallowing
- ☐ Tooth brushing
- ☐ Washing one's face
- ☐ Drinking
- ☐ Shaving
- ☐ Application of make-up
- ☐ Drying one's face
- ☐ Cough
- ☐ Yawning
- ☐ Sneezing
- ☐ Pronouncing labial letters
- ☐ Other.....
- .....
- .....

**Indicate the intraoral or extraoral zones that, if stimulated, trigger pain:**

- ☐ Nasal wing
- ☐ Cheekbone
- ☐ Supraorbital region
- ☐ Upper lip
- ☐ Lower lip
- ☐ Cheek
- ☐ Upper eyelid
- ☐ Lower eyelid
- ☐ Chin
- ☐ Jaw
- ☐ Alveolar gingiva
- ☐ Hard palate
- ☐ Tongue
- ☐ Other.....
- .....

**Draw the intraoral or extraoral zones that, if stimulated, trigger electric shock like pain. Indicate with a dot line the evoked paroxysmal pain distribution.**

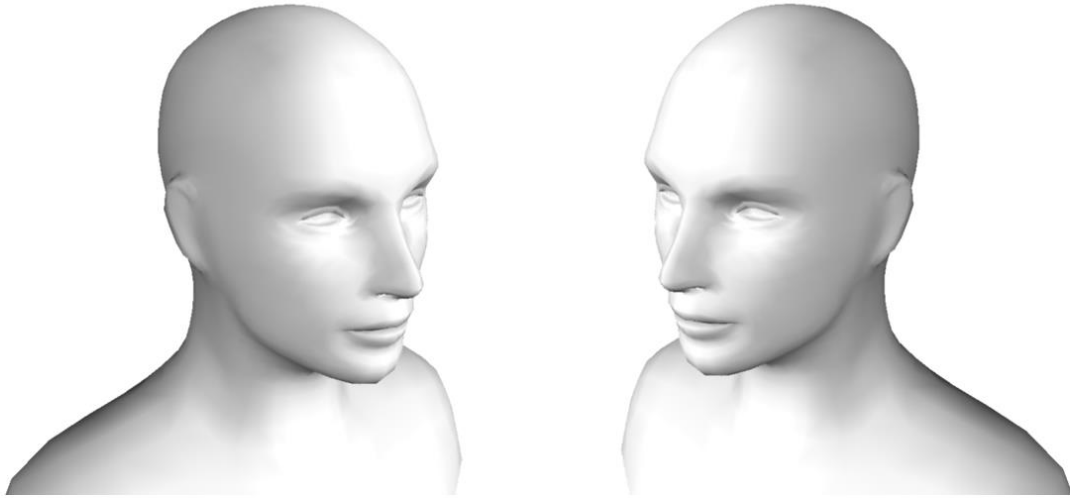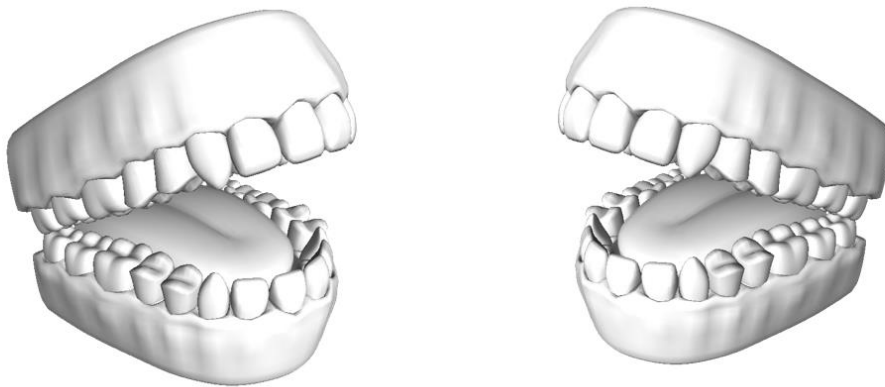

**Has the pain distribution changed during the disease course?** YES NO

**If yes, please specify**.....

**Did you experience any remission period, during which you could discontinue medications?**

YES NO

**If yes, please specify the duration of remission period in months**.....

**Do you suffer from hypertension?** YES NO

**If yes, please specify the age at onset and pharmacological treatment**.....

.....

Do you suffer from depression? YES NO

If yes, please specify the age at onset and pharmacological treatment

.....  
.....

Does pain ever wake you up during the night? YES NO

Are there any other cases of trigeminal neuralgia in your family? YES NO

If yes, please specify the degree of consanguinity.....

Age of onset of trigeminal neuralgia in your relative: .....

Pedigree

Where was the diagnosis carried out? (please indicate the center) .....

Please specify the pharmacological treatment (i.e. carbamazepine, oxcarbazepine, phenytoin):

.....

Is paroxysmal pain ever associated with one of these symptoms?

- ☐ Conjunctival tearing
- ☐ Conjunctival injection
- ☐ Running nose/clogged nose

Is paroxysmal pain associated with concomitant continuous pain? YES NO

If yes, please specify the pain area.....

Please specify the duration of prolonged, continuous pain

- ☐ Minutes Number.....
- ☐ Hours Number.....
- ☐ Continuous, without pain free intervals

Is constant pain temporary-related to paroxysmal pain (i.e. does it follow the electric shock)?

YES NO

**Age at onset of concomitant continuous pain .....**

**Please specify the quality of continuous pain**

- ☐ Burning
- ☐ Pressing
- ☐ Other.....
